# Supplementary material for: Retinal Glial and Choroidal Vascular Pathology in Donors Clinically Diagnosed With Stargardt Disease
Source: PubMed Central journal article supplement — Invest Ophthalmol Vis Sci. 2020 Jul 21;61(8):27. doi: 10.1167/iovs.61.8.27 (PMC7425722; doi:10.1167/iovs.61.8.27), 2020-07-21
Supplement: iovs-61-8-27_s001.pdf [file iovs-61-8-27_s001.pdf]

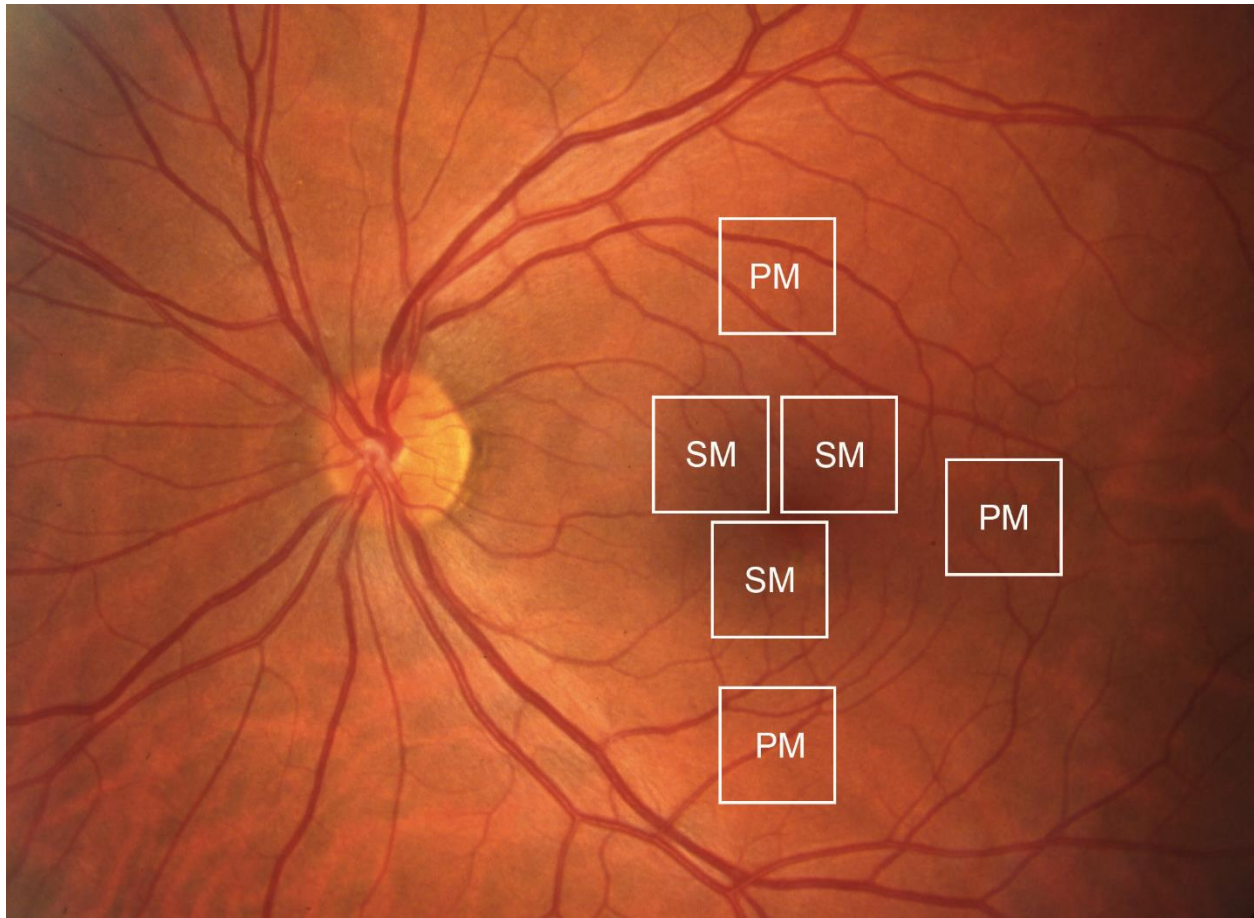

**Supplemental Figure 1. The gross photograph of a normal eye demonstrating the areas used for CC measurements.** As shown, three areas were taken from the perimacular (PM) and submacular (SM) regions.
