# Supplementary material for: Retinal Glial and Choroidal Vascular Pathology in Donors Clinically Diagnosed With Stargardt Disease
Source: PubMed Central journal article supplement — Invest Ophthalmol Vis Sci. 2020 Jul 21;61(8):27. doi: 10.1167/iovs.61.8.27 (PMC7425722; doi:10.1167/iovs.61.8.27), 2020-07-21
Supplement: iovs-61-8-27_s002.pdf [file iovs-61-8-27_s002.pdf]

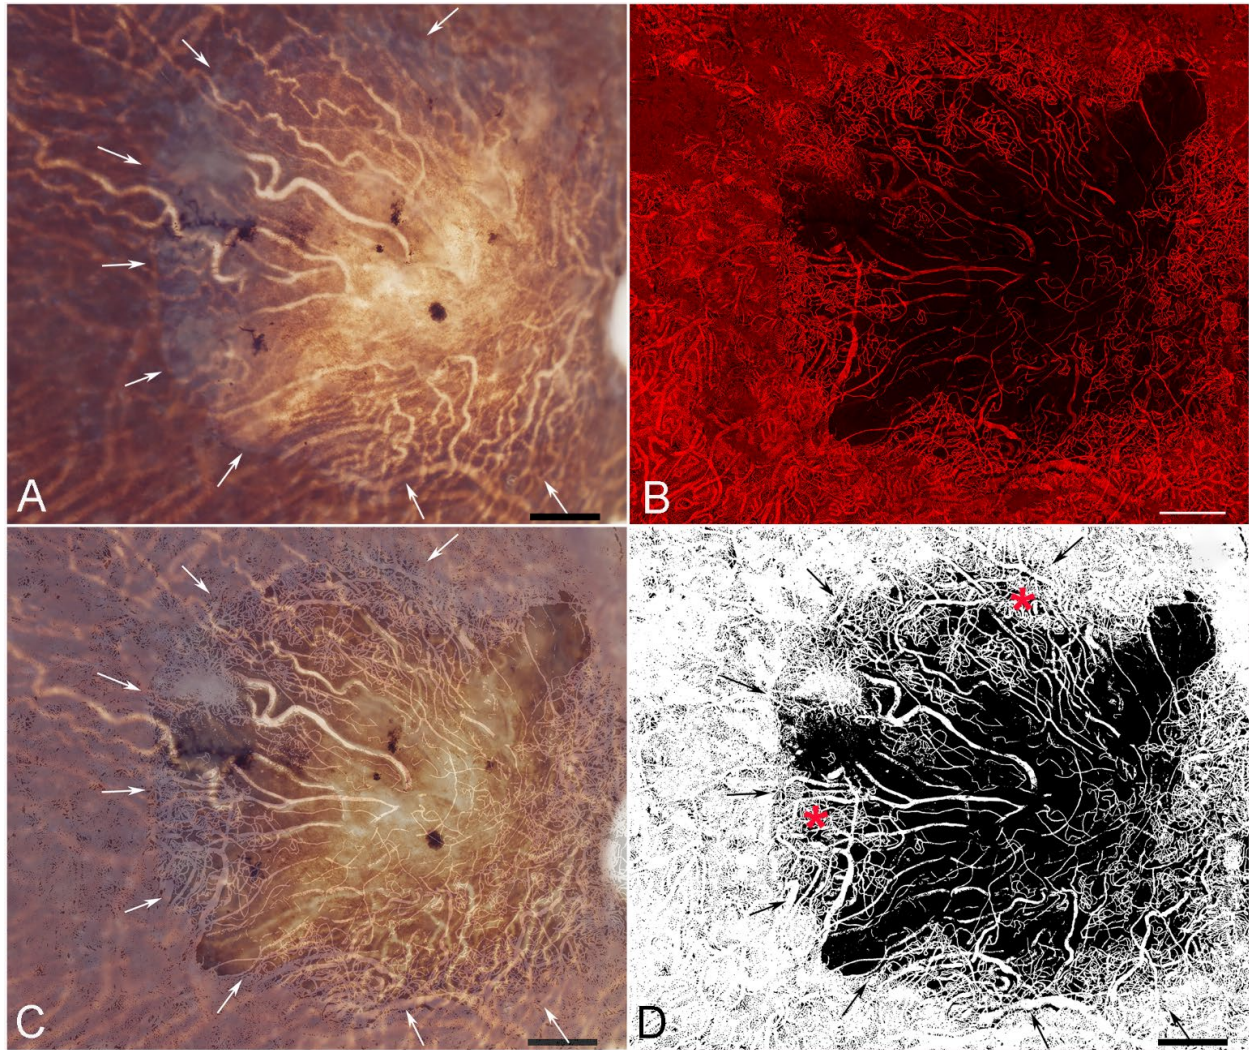

**Supplemental Fig. 2. The correlation between RPE atrophy and CC loss in Donor 1.** (A) Gross photograph of the RPE and choroid after removing the retina. (B) UEA lectin staining of the choroidal vessels. (C) Thresholding of image A enabled more accurate measuring of the area of RPE loss. (D) Thresholding of UEA lectin stained choroid more clearly defines the area of CC loss. Arrows indicate the atrophic areas. Red asterisks mark areas with surviving CC under RPE loss. Scale bars indicate 1 mm in all images.
