# Supplementary material for: Retinal Glial and Choroidal Vascular Pathology in Donors Clinically Diagnosed With Stargardt Disease
Source: PubMed Central journal article supplement — Invest Ophthalmol Vis Sci. 2020 Jul 21;61(8):27. doi: 10.1167/iovs.61.8.27 (PMC7425722; doi:10.1167/iovs.61.8.27), 2020-07-21
Supplement: iovs-61-8-27_s003.pdf [file iovs-61-8-27_s003.pdf]

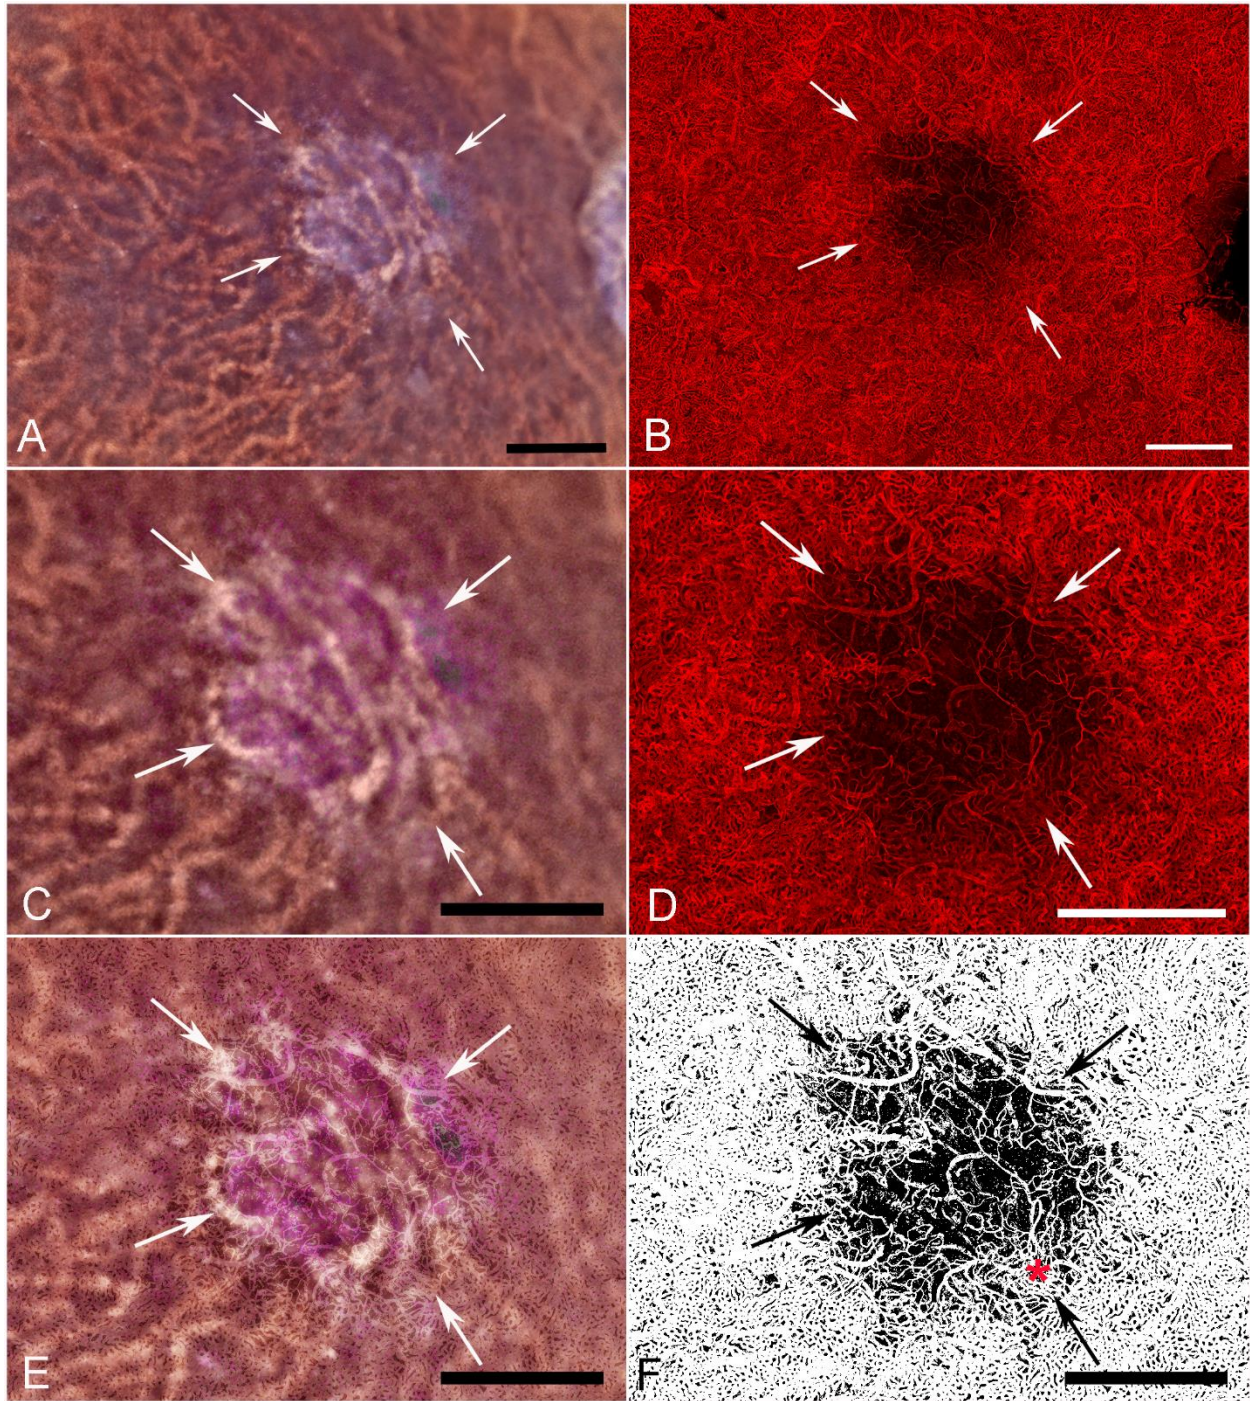

**Supplemental Fig. 3. The correlation between RPE atrophy and CC loss in Donor 2.**

(A) Gross photograph of the RPE and choroid after removing the retina. (B) UEA lectin staining of the choroidal vessels. (C) Higher magnification of image A enabled more accurate measuring of the area of RPE loss. (D) Higher magnification of UEA stained choroid more clearly defines the area of CC loss. (E) The RPE overlaid with the thresholded image of the UEA stained vasculature shows the relationship of RPE atrophy to vascular changes. There are areas of surviving CC in the region of RPE atrophy. (F) Thresholding of Image in D shows CC loss. Arrows indicate the atrophic areas. Red asterisk in F shows area with CC survival under RPE atrophy. Scale bars indicate 1mm in all images.
