# Supplementary material for: Retinal Glial and Choroidal Vascular Pathology in Donors Clinically Diagnosed With Stargardt Disease
Source: PubMed Central journal article supplement — Invest Ophthalmol Vis Sci. 2020 Jul 21;61(8):27. doi: 10.1167/iovs.61.8.27 (PMC7425722; doi:10.1167/iovs.61.8.27), 2020-07-21
Supplement: iovs-61-8-27_s005.pdf [file iovs-61-8-27_s005.pdf]

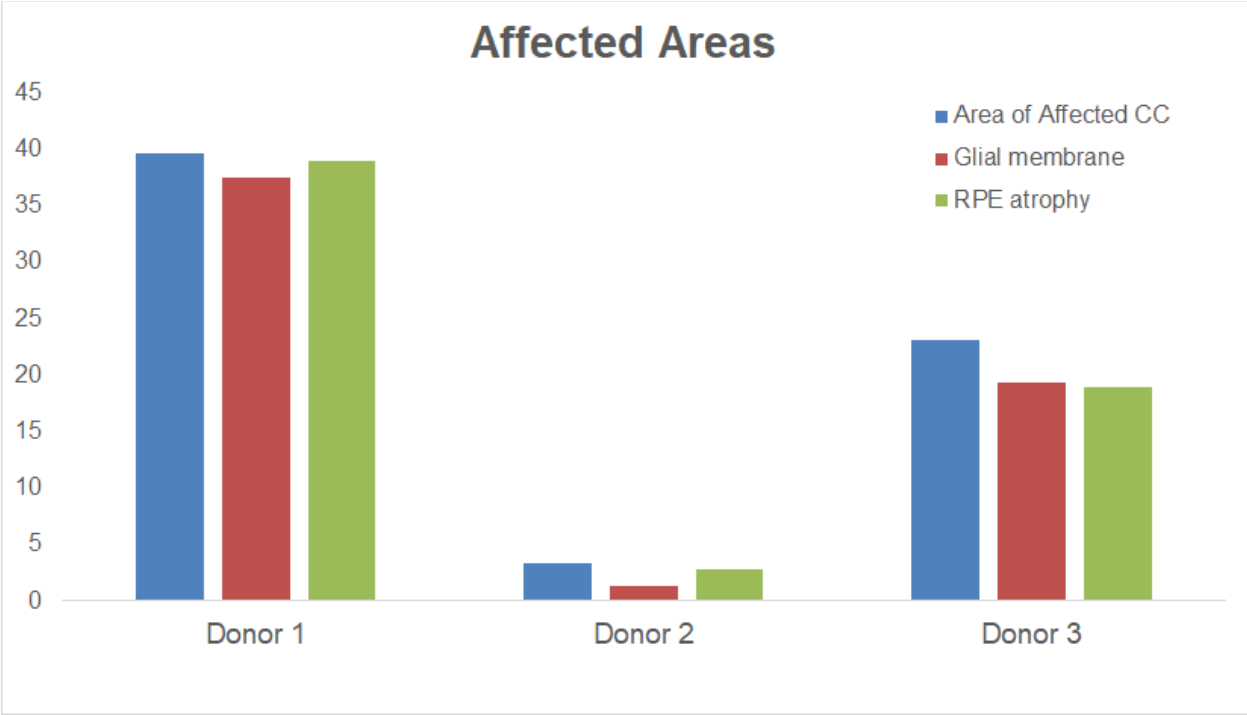

**Supplemental Figure 5. The affected areas were significantly correlated in each Donor eye.** This chart displays the areas of RPE atrophy, CC loss and subretinal glial membranes in each donor. As shown, these areas were very similar in all three donors. The correlation coefficient between the areas of CC and RPE atrophy, CC atrophy and glial membrane and RPE atrophy and glial membranes were all  $>0.99$ .
